# Supplementary material
Source: Elsevier journal article supplement (https://www.sciencedirect.com/science/article/pii/S0212656718304505)
Supplement: mmc1 [file S0212656718304505:mmc1.doc]

**MATERIAL SUPLEMENTARIO**

**Anexo 1: Tipos de enfermedades crónicas consideradas por los GMA**

| Abuso de sustancias |
| --- |
| Anemia |
| Ansiedad |
| Artritis |
| Artrosis |
| Artrosis |
| Asma |
| AVC |
| Cardiopatía Isquémica |
| Cirrosis |
| Colitis ulcerosa |
| Demencia |
| Depresión |
| Diabetes |
| Disrritmias |
| Enfermedad cardiopulmonar |
| Epilepsia |
| EPOC |
| Esclerosis múltiple |
| Esquizofrenia |
| Glaucoma |
| Hiperlipidemia |
| HTA |
| IC |
| IRC |
| Hodgkin/ Otros linfomas |
| Leucemia |
| Neo activa higado |
| Neo activa cuerpo uterino |
| Neo activa piel |
| Neo activa ORL |
| Neo activa partes blandas |
| Neo activa testiculo |
| Neo activa de colon |
| Neo activa de cuello uterino |
| Neo activa de estómago |
| Neo activa de mama |
| Neo activa de próstata |
| Neo activa de páncreas |
| Neo activa de pulmón |
| Neo activa de tiroides |
| Neo activa de vejiga |
| Neo activa del SNC |
| Neo activa renal |
| Retinoblastoma |
| Hepatoblastoma |
| Obesidad |
| Osteoporosis |
| Parkinson |
| Retraso mental |
| T. de tiroides |
| T. Por alcohol |
| TDAH |
| Úlcera gastroduodenal |
| Valvulopatía |
| Vasculitis |
| VIH |


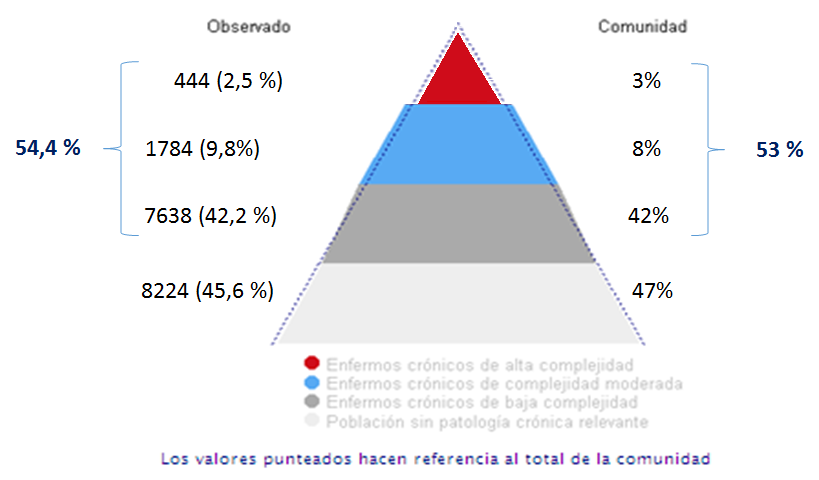
**Anexo 2. Prevalencia de enfermos crónicos en base a GMA del Centro de Salud Ciudad Jardín vs Comunidad de Madrid**
